# Supplementary material for: Does higher early neonatal mortality in boys reverse over the neonatal period? A pooled analysis from three trials of Nepal
Source: PubMed Central journal article supplement (PMC9121405; doi:10.1136/bmjopen-2021-056112), 2022-05-18
Supplement: bmjopen-2021-056112supp001.pdf [file bmjopen-2021-056112supp001.pdf]

## ANNEX

Table 1: Mortality Rates by age and sex for NNIPS-3

| NNIPS-3 (1999-2000) N=4,127 |                |              |            |                      |                                    |                 |                 |            |                      |                                    |
|-----------------------------|----------------|--------------|------------|----------------------|------------------------------------|-----------------|-----------------|------------|----------------------|------------------------------------|
| Age Group                   | Males (N=2082) |              |            |                      |                                    | Females(N=2045) |                 |            |                      |                                    |
|                             | Deaths         | Person Year  | Death Rate | Probability of Dying | Cumulative Probability (Mortality) | Deaths          | Person Year     | Death Rate | Probability of Dying | Cumulative Probability (Mortality) |
| 0-1day                      | 35             | 2064         | 0.0169575  | .017                 | .0168                              | 25              | 2031.5          | 0.0123063  | .0123                | .0122                              |
| 1-3 days                    | 24             | 4055         | 0.0059186  | .0118                | .0284                              | 13              | 4014.0          | 0.0032387  | .0065                | .0186                              |
| 3-7 days                    | 8              | 8063         | 0.0009222  | .004                 | .0322                              | 16              | 7973.0          | 0.0020068  | .008                 | .0265                              |
| 7-14 days                   | 13             | 14051        | 0.0009252  | .0065                | .0385                              | 14              | 13852.0         | 0.0010107  | .0071                | .0333                              |
| 14-21 days                  | 10             | 13964        | 0.0007161  | .005                 | .0433                              | 8               | 13782.0         | 0.0005805  | .0041                | .0372                              |
| 21-28 days                  | 2              | 13927        | 0.0001436  | .001                 | .0442                              | 5               | 13744.0         | 0.0003638  | .0025                | .0397                              |
| <b>Total</b>                | <b>92</b>      | <b>56123</b> |            |                      |                                    | <b>81</b>       | <b>55396.48</b> |            |                      |                                    |

Table 2: Mortality Rates by age and sex for Chlorhexidine Study

| CHX Study( 2002-2006) N=23,644 |                   |               |            |                      |                                    |                   |               |            |                      |                                    |
|--------------------------------|-------------------|---------------|------------|----------------------|------------------------------------|-------------------|---------------|------------|----------------------|------------------------------------|
| Age Group                      | Males (N= 12,188) |               |            |                      |                                    | Females(N=11,456) |               |            |                      |                                    |
|                                | Deaths            | Person Year   | Death Rate | Probability of Dying | Cumulative Probability (Mortality) | Deaths            | Person Year   | Death Rate | Probability of Dying | Cumulative Probability (Mortality) |
| 0-1day                         | 141               | 12065         | 0.0116866  | .0117                | .0116                              | 112               | 11362         | 0.0098573  | .0099                | .0098                              |
| 1-3 days                       | 96                | 23924         | 0.0040127  | .008                 | .0195                              | 80                | 22559         | 0.0035463  | .0071                | .0168                              |
| 3-7 days                       | 57                | 47541         | 0.0011990  | .0048                | .0242                              | 44                | 44879         | 0.0009804  | .0039                | .0207                              |
| 7-14 days                      | 39                | 82881         | 0.0004706  | .0033                | .0274                              | 43                | 78208         | 0.0005498  | .0038                | .0244                              |
| 14-21 days                     | 26                | 82648         | 0.0003146  | .0022                | .0296                              | 36                | 77929         | 0.0004620  | .0032                | .0276                              |
| 21-28 days                     | 12                | 82477         | 0.0001455  | .001                 | .0305                              | 23                | 77685         | 0.0002961  | .0021                | .0296                              |
| <b>Total</b>                   | <b>371</b>        | <b>331536</b> |            |                      |                                    | <b>338</b>        | <b>312622</b> |            |                      |                                    |

**Table 3: Mortality Rates by age and sex for NOMS**

| <b>NOMS (2010-2017) N=31,958</b> |                          |                    |                   |                             |                                           |                          |                    |                   |                             |                                            |
|----------------------------------|--------------------------|--------------------|-------------------|-----------------------------|-------------------------------------------|--------------------------|--------------------|-------------------|-----------------------------|--------------------------------------------|
|                                  | <b>Males (N= 16,533)</b> |                    |                   |                             |                                           | <b>Females(N=15,425)</b> |                    |                   |                             |                                            |
| <b>Age Group</b>                 | <b>Deaths</b>            | <b>Person Year</b> | <b>Death Rate</b> | <b>Probability of Dying</b> | <b>Cumulative Probability (Mortality)</b> | <b>Deaths</b>            | <b>Person Year</b> | <b>Death Rate</b> | <b>Probability of Dying</b> | <b>Cumulative Probability. (Mortality)</b> |
| 0-1day                           | 225                      | 16343              | 0.0137674         | .0138                       | .0137                                     | 189                      | 15266              | 0.0123804         | .0124                       | .0123                                      |
| 1-3 days                         | 133                      | 32377              | 0.0041079         | .0082                       | .0217                                     | 107                      | 30273              | 0.0035345         | .0071                       | .0193                                      |
| 3-7 days                         | 87                       | 64045              | 0.0013584         | .0054                       | .027                                      | 60                       | 59997              | 0.0010000         | .004                        | .0232                                      |
| 7-14 days                        | 44                       | 110578             | 0.0003979         | .0028                       | .0298                                     | 38                       | 103879             | 0.0003658         | .0026                       | .0257                                      |
| 14-21 days                       | 47                       | 109206             | 0.0004304         | .003                        | .0327                                     | 33                       | 102730             | 0.0003212         | .0022                       | .0279                                      |
| 21-28 days                       | 12                       | 106394             | 0.0001128         | .0008                       | .0334                                     | 22                       | 100177             | 0.0002196         | .0015                       | .0294                                      |
| <b>Total</b>                     | <b>548</b>               | <b>438943</b>      |                   |                             |                                           | <b>449</b>               | <b>412322</b>      |                   |                             |                                            |

**Table 4: Mortality Rates by age and sex for Pooled Study**

| <b>Pooled Nepal Datasets ( 1999-2017) N=59,729</b> |                        |                    |                   |                             |                                           |                         |                    |                   |                             |                                           |
|----------------------------------------------------|------------------------|--------------------|-------------------|-----------------------------|-------------------------------------------|-------------------------|--------------------|-------------------|-----------------------------|-------------------------------------------|
|                                                    | <b>Males (N=30803)</b> |                    |                   |                             |                                           | <b>Females(N=28926)</b> |                    |                   |                             |                                           |
| <b>Age Group</b>                                   | <b>Deaths</b>          | <b>Person Year</b> | <b>Death Rate</b> | <b>Probability of Dying</b> | <b>Cumulative Probability (Mortality)</b> | <b>Deaths</b>           | <b>Person Year</b> | <b>Death Rate</b> | <b>Probability of Dying</b> | <b>Cumulative Probability (Mortality)</b> |
| 0-1day                                             | 401                    | 30472              | 0.0131596         | .0132                       | .0131                                     | 326                     | 28660              | 0.0113748         | .0114                       | .0113                                     |
| 1-3 days                                           | 253                    | 60356              | 0.0041918         | .0084                       | .0213                                     | 200                     | 56846              | 0.0035183         | .007                        | .0182                                     |
| 3-7 days                                           | 152                    | 119649             | 0.0012704         | .0051                       | .0263                                     | 120                     | 112849             | 0.0010634         | .0043                       | .0224                                     |
| 7-14 days                                          | 96                     | 207511             | 0.0004626         | .0032                       | .0294                                     | 95                      | 195939             | 0.0004848         | .0034                       | .0257                                     |
| 14-21 days                                         | 83                     | 205818             | 0.0004033         | .0028                       | .0322                                     | 77                      | 194441             | 0.0003960         | .0028                       | .0284                                     |
| 21-28 days                                         | 26                     | 202798             | 0.0001282         | .0009                       | .033                                      | 50                      | 191606             | 0.0002610         | .0018                       | .0302                                     |
| <b>Total</b>                                       | <b>1011</b>            | <b>826603</b>      |                   |                             |                                           | <b>868</b>              | <b>780340</b>      |                   |                             |                                           |
